# Supplementary material
Source: PubMed Central journal article supplement (PMC6361169)
Supplement: NIHMS1510058-supplement-1.pdf [file NIHMS1510058-supplement-1.pdf]

|    |                                                |    |
|----|------------------------------------------------|----|
| 1  | SUPPLEMENTAL INFORMATION                       |    |
| 2  | Watershed delineation method.....              | S1 |
| 3  | Calculating maximum $r^2$ .....                | S2 |
| 4  | Residual spatial autocorrelation analysis..... | S3 |
| 5  | Figures S1-S4                                  |    |
| 6  | Model results .....                            | S4 |
| 7  | Tables S1-S6                                   |    |
| 8  | Correlations among predictor variables .....   | S5 |
| 9  | Figure S5                                      |    |
| 10 | Table S4                                       |    |
| 11 |                                                |    |
| 12 |                                                |    |

13 *S1. Watershed delineation method*

14 Watersheds associated with sampling points were delineated using the approach in the Stream  
15 Catchment dataset (Hill et al., 2016) which is based on NHDPlus Version 2 [NHDPlusV2(101)]. NHDPlusV2  
16 defines a local drainage catchment for every stream reach, and the watershed is the combination of the  
17 local catchment for a stream reach and all upstream catchments. The local catchment is adjusted to only  
18 include the area upstream of the sampling point and then combined with upstream catchments.

19

## 20 S2 Calculating Maximum $r^2$

21 N concentrations are temporally variable, and static predictor variables used in the model  
22 cannot be expected to account for this variability. The maximum  $r^2$  value for the regression models  
23 depends on the amount of variability attributable to temporal variability relative to total variability in  
24 the data. The larger the amount of variability attributable to temporal variability, the lower the  
25 maximum  $r^2$  possible (Olson and Hawkins, 2013):

$$26 \text{Maximum } r^2 = \text{Var}(\text{Site}) / (\text{Var}(\text{Site}) + \text{Var}(\text{Rep}))$$

27 where  $\text{Var}(\text{Site})$  is the variance associated with spatial variability (across sites), and  $\text{Var}(\text{Rep})$  is the  
28 within-site variance over time. We used the approach outlined by John Olson (personal communication),  
29 to calculate the maximum  $r^2$  values possible for our TN, DIN, and TON models. This approach uses a  
30 linear mixed model, with site as a random factor, to isolate the within-site variability, which we obtain  
31 from the ~9% of sites that were more than once. The R code and output are below.

## 32 Signal-Noise

33 Calculate the signal to noise ratio for TN, DIN, and DON in NRSA data set.

```
34 library(lme4)
35 ## Loading required package: Matrix
36 Read in data
37 Linear mixed models for TN, DIN, TON with site as random factor:
38 # note: Values are log-transformed so results are relevant to regressions, wh
39 ich are also based on log-transformed data.
40
41 ## TN "Null" model
42 TN.S2N.null <- lmer(log(TN) ~ 1 + (1|SITE_ID), data=site.chem, REML=T, verbos
43 e=F)
44
45 TN.Site.var <- as.numeric(VarCorr(TN.S2N.null))
46 TN.Rep.var <- attr(VarCorr(TN.S2N.null), "sc")^2
47 TN.SN <- TN.Site.var/TN.Rep.var
48 TN.maxR2 <- TN.SN/(TN.SN+1)
49
50 ## DIN "Null" model
51 DIN.S2N.null <- lmer(log(DIN) ~ 1 + (1|SITE_ID), data=site.chem, REML=T, verb
52 ose=F)
53
54 DIN.Site.var <- as.numeric(VarCorr(DIN.S2N.null))
55 DIN.Rep.var <- attr(VarCorr(DIN.S2N.null), "sc")^2
56 DIN.SN <- DIN.Site.var/DIN.Rep.var
57 DIN.maxR2 <- DIN.SN/(DIN.SN+1)
58
```

```

59 ## DON "Null" model
60 DON.S2N.null <- lmer(log(DON+0.005) ~ 1 + (1|SITE_ID), data=site.chem, REML=T
61 , verbose=F)
62
63 DON.Site.var <- as.numeric(VarCorr(DON.S2N.null))
64 DON.Rep.var <- attr(VarCorr(DON.S2N.null), "sc")^2
65 DON.SN <- DON.Site.var/DON.Rep.var
66 DON.maxR2 <- DON.SN/(DON.SN+1)

```

67 lmer summaries for each null model, followed by extracted variances, S:N, and max r2 for each  
68 form of N:

```

69 summary(TN.S2N.null)
70 ## Linear mixed model fit by REML ['lmerMod']
71 ## Formula: log(TN) ~ 1 + (1 | SITE_ID)
72 ## Data: site.chem
73 ##
74 ## REML criterion at convergence: 6419.2
75 ##
76 ## Scaled residuals:
77 ##   Min       1Q   Median       3Q      Max
78 ## -3.5435 -0.2069  0.0029  0.2110  3.9523
79 ##
80 ## Random effects:
81 ##   Groups   Name              Variance Std.Dev.
82 ## SITE_ID (Intercept) 1.1910     1.091
83 ## Residual              0.1347     0.367
84 ## Number of obs: 2155, groups: SITE_ID, 1968
85 ##
86 ## Fixed effects:
87 ##              Estimate Std. Error t value
88 ## (Intercept) -0.52223    0.02589  -20.17

```

```

89 summary(DIN.S2N.null)
90 ## Linear mixed model fit by REML ['lmerMod']
91 ## Formula: log(DIN) ~ 1 + (1 | SITE_ID)
92 ## Data: site.chem
93 ##
94 ## REML criterion at convergence: 8115.9
95 ##
96 ## Scaled residuals:
97 ##   Min       1Q   Median       3Q      Max
98 ## -4.8196 -0.3023 -0.0268  0.2498  5.0606
99 ##
100 ## Random effects:
101 ##   Groups   Name              Variance Std.Dev.
102 ## SITE_ID (Intercept) 2.5687     1.6027
103 ## Residual              0.3232     0.5685
104 ## Number of obs: 2155, groups: SITE_ID, 1968

```

```

105 ##
106 ## Fixed effects:
107 ##           Estimate Std. Error t value
108 ## (Intercept) -1.88982    0.03823  -49.44

109 summary(DON.S2N.null)

110 ## Linear mixed model fit by REML ['lmerMod']
111 ## Formula: log(DON + 0.005) ~ 1 + (1 | SITE_ID)
112 ##   Data: site.chem
113 ##
114 ## REML criterion at convergence: 6046.1
115 ##
116 ## Scaled residuals:
117 ##      Min       1Q   Median       3Q      Max
118 ## -4.3262 -0.2487  0.0248  0.2734  3.7988
119 ##
120 ## Random effects:
121 ##   Groups   Name      Variance Std.Dev.
122 ## SITE_ID (Intercept) 0.8903   0.9436
123 ## Residual              0.1801   0.4244
124 ## Number of obs: 2155, groups:  SITE_ID, 1968
125 ##
126 ## Fixed effects:
127 ##           Estimate Std. Error t value
128 ## (Intercept) -1.19277    0.02322  -51.36

129 # table of results
130 results <- cbind(c(TN.Site.var, TN.Rep.var, TN.SN, TN.maxR2),
131                 c(DIN.Site.var, DIN.Rep.var, DIN.SN, DIN.maxR2),
132                 c(DON.Site.var, DON.Rep.var, DON.SN, DON.maxR2))
133 row.names(results) <- c("Site.var", "Rep.va", "S:N", "max R2")
134 colnames(results) <- c("TN", "DIN", "DON")
135
136 results

137 ##           TN           DIN           DON
138 ## Site.var 1.1910458 2.5686720 0.8903351
139 ## Rep.va   0.1347144 0.3231632 0.1800859
140 ## S:N      8.8412690 7.9485295 4.9439474
141 ## max R2   0.8983871 0.8882498 0.8317616

```

142

143

144 *S3. Residual spatial autocorrelation analysis*

145 Stream nutrient concentration measurements from sites with nested watersheds are not truly  
146 independent because the sampling sites share drainage areas and stream flow. However, if spatial  
147 factors that control the variability in nutrient concentrations are modeled well, the model residuals will  
148 not be spatially correlated and coefficients should not be biased (Kuhn and Dormann 2012). The  
149 majority of NRSA sites (87%) are nested within other watersheds and/or have sites nested within their  
150 watersheds, so we assess the potential effect of this lack of independence on model results.

151 Because nested sampling sites are physically connected via water flow, flow distance is a more  
152 appropriate measure of spatial relatedness than Euclidean distance. Additionally, the larger the fraction  
153 of flow at the downstream site that is contributed by the upstream site, the more correlated the sites  
154 are likely to be. Therefore, we used semivariograms to qualitatively examine residual variance as a  
155 function of flow distance, fraction watershed uniqueness (100 - % overlap)/100, and a combined  
156 uniqueness index that is calculated as the product of those two values (with flow distance normalized to  
157 the maximum distance). Pairs were binned every 10% decrease in spatial-relatedness measure, so the  
158 number of pairs varies from bin to bin. The nugget (0 difference in space) was calculated by using the  
159 difference in residuals from site that were visited twice. Increasing semi-variance with decreasing spatial  
160 relatedness based on all three measures indicated that there was some residual spatial autocorrelation  
161 in the data (Fig. S1), although values in bins with few pairs should be interpreted with caution.

162 To test whether parameter coefficients from the model based on all data were biased due to the  
163 inclusion of nested sampling sites, we subsetted the data into 200 sets of 200 sites with non-nested  
164 watersheds: for each subset, a sampling site was randomly selected, any sites connected via upstream  
165 or downstream flow were removed from possible selection, then another watershed was randomly  
166 selected, and so on, until either 200 sites were obtained, or no more independent watersheds were  
167 available. TN, DIN, and TON were modeled, and the average model coefficients from all runs were  
168 compared to those obtained when all data are used simultaneously. All average coefficient values, plus  
169 or minus 2 standard errors, fell within 95% confidence intervals of coefficients from the model using all  
170 data (Figures S2-S4), suggesting that coefficients estimated using all data are not strongly affected by  
171 included sampling sites from nested watersheds. Therefore, we report results from the model based on  
172 all available sites.

173

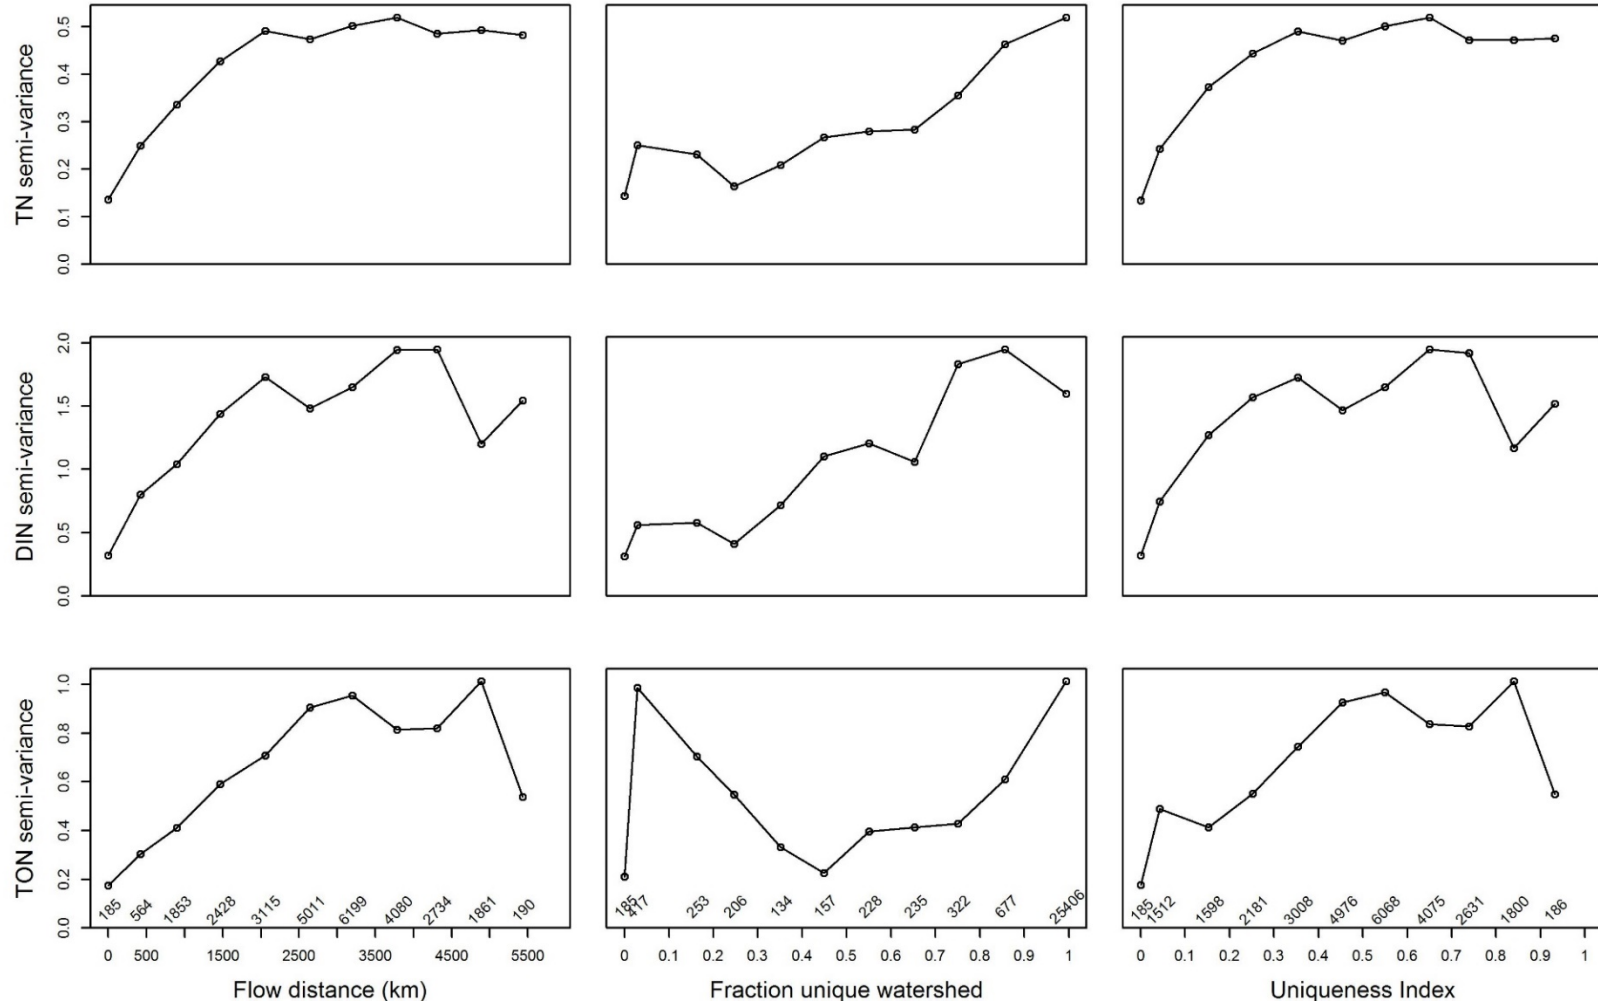

**Figure S1.** Semi-variograms for residuals of TN (top row), DIN (middle row), and TON (bottom row) models (unstandardized data) based on flow distance between sampling sites (top row), Fraction uniqueness of watersheds [(100 - % overlap of smaller in larger)/100], and a uniqueness index that is the product of flow distance normalized to the maximum distance and fraction uniqueness (see text for more explanation). The value at 0 (nugget) reflects semi-variance across time in sites with two visits. Values just above the x-axis in the bottom row correspond to the number of pairs of watersheds in each bin.

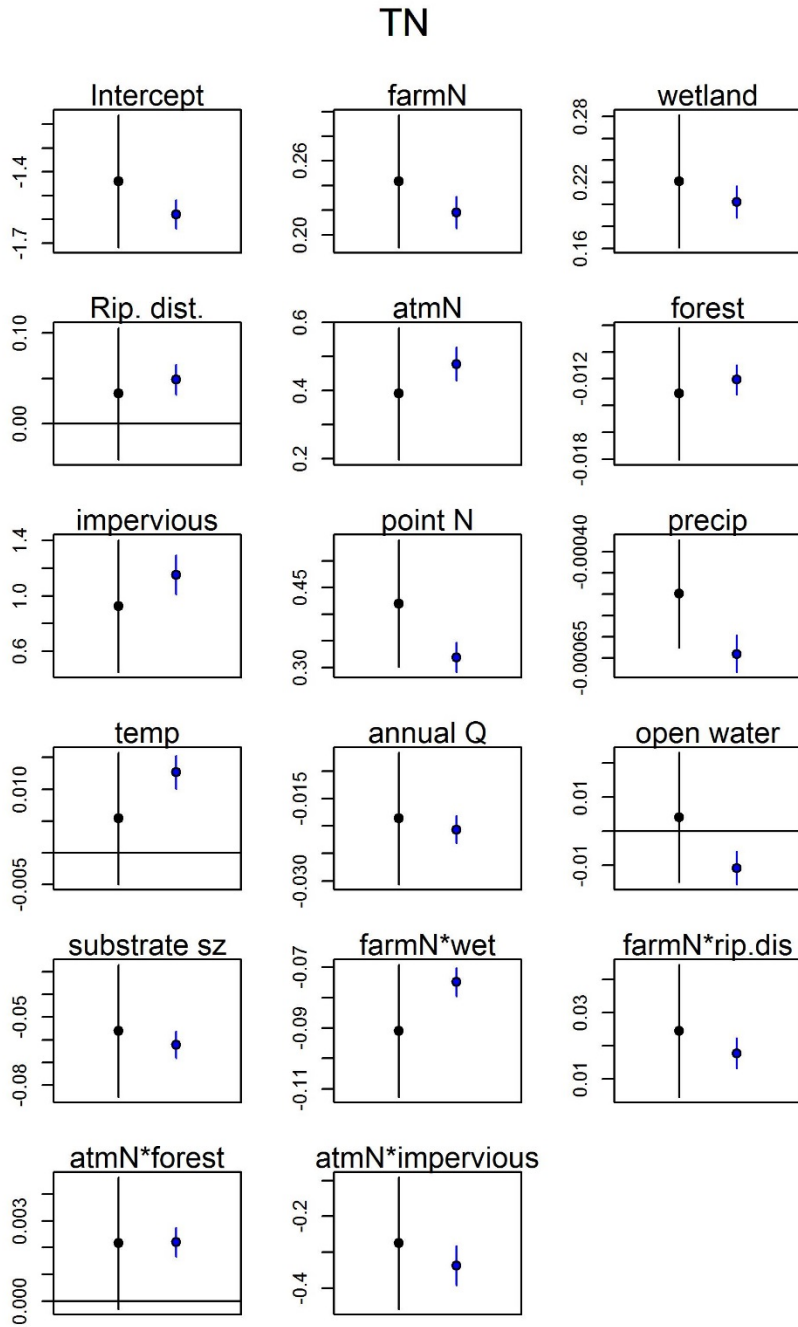

**Figure S2.** Comparison of the coefficient values from the TN model based on all sampling sites (black) and the average of coefficient values from the 200 model runs, each with an different set of truly independent watersheds (blue). Vertical lines represent +/- 2 standard errors.



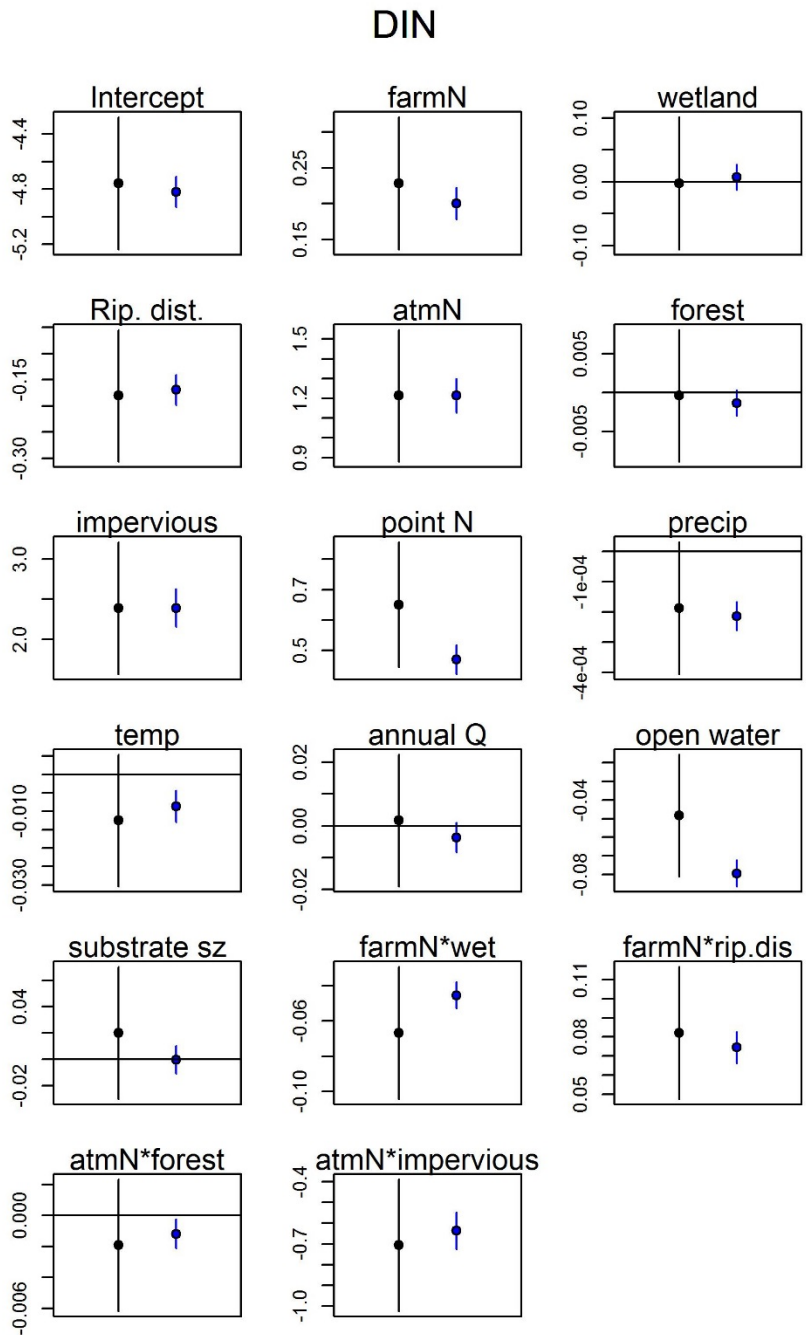

**Figure S3.** Comparison of the coefficient values from the DIN model based on all sampling sites (black) and the average of coefficient values from the 200 model runs, each with an different set of truly independent watersheds (blue). Vertical lines represent +/- 2 standard errors.

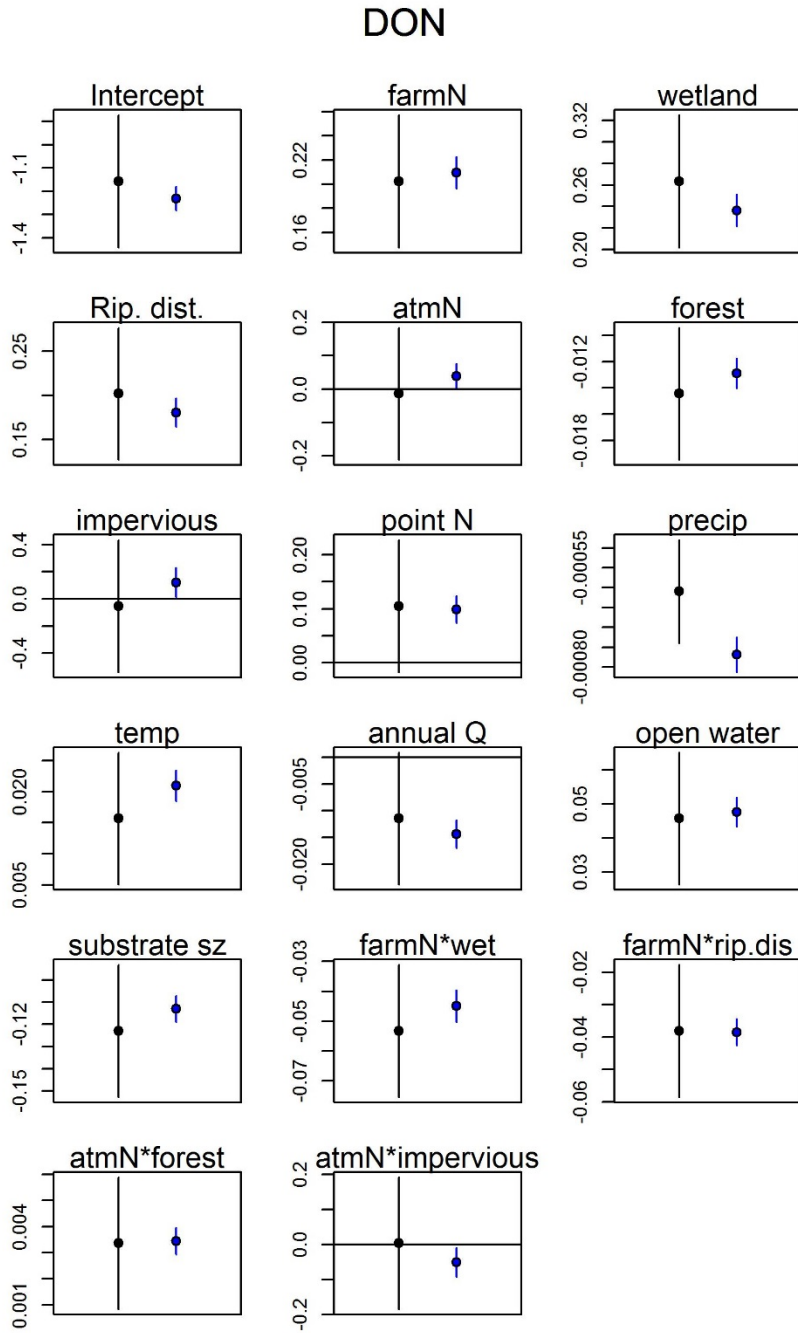

**Figure S4.** Comparison of the coefficient values from the TON model based on all sampling sites (black) and the average of coefficient values from the 200 model runs, each with an different set of truly independent watersheds (blue). Vertical lines represent +/- 2 standard errors.

S4. Model Results

**Table S1.** Parameter coefficients and AIC values for the top TN model, and models within 2 AIC of the top model.

| Intercept | % Forest | Atm N dep | Agricultural N | % Impervious | Point source N | Discharge | % Riparian disturbance | % Wetland | % Open water | Precipitation | Substrate Size | Temperature | Atm N *<br>% Forest | Atm N *<br>% Impervious | Agricultural N<br>* % Riparian<br>disturbance | Agricultural N<br>* % Wetland | AIC     |
|-----------|----------|-----------|----------------|--------------|----------------|-----------|------------------------|-----------|--------------|---------------|----------------|-------------|---------------------|-------------------------|-----------------------------------------------|-------------------------------|---------|
| -1.44     | -0.013   | 0.42      | 0.24           | 0.95         | 0.42           | -0.018    | 0.026                  | 0.22      | NA           | -0.00047      | -0.059         | NA          | 0.0021              | -0.28                   | 0.023                                         | -0.089                        | 4326.58 |
| -1.62     | -0.010   | 0.54      | 0.24           | 1.00         | 0.43           | -0.018    | 0.036                  | 0.21      | NA           | -0.00049      | -0.059         | NA          | NA                  | -0.31                   | 0.017                                         | -0.088                        | 4327.47 |
| -1.44     | -0.013   | 0.40      | 0.24           | 0.91         | 0.42           | -0.018    | 0.030                  | 0.22      | NA           | -0.00050      | -0.056         | 0.0046      | 0.0021              | -0.27                   | 0.025                                         | -0.091                        | 4327.78 |
| -1.44     | -0.013   | 0.42      | 0.24           | 0.95         | 0.42           | -0.018    | 0.026                  | 0.21      | 0.00224      | -0.00047      | -0.059         | NA          | 0.0022              | -0.28                   | 0.023                                         | -0.088                        | 4328.52 |

**Table S2.** Parameter coefficients and AIC values for the top DIN model, and models within to AIC of the top model.

| Intercept | % Forest | Atm N dep | Agricultural N | % Impervious | Point source N | Discharge | % Riparian disturbance | % Wetland | % Open water | Precipitation | Substrate Size | Temperature | Atm N *<br>% Forest | Atm N *<br>% Impervious | Agricultural N<br>* % Riparian<br>disturbance | Agricultural N<br>* % Wetland | AIC     |
|-----------|----------|-----------|----------------|--------------|----------------|-----------|------------------------|-----------|--------------|---------------|----------------|-------------|---------------------|-------------------------|-----------------------------------------------|-------------------------------|---------|
| -4.57     | -0.0038  | 1.11      | 0.23           | 2.29         | 0.64           | NA        | -0.19                  | -0.012    | -0.047       | -0.00016      | NA             | -0.015      | NA                  | -0.66                   | 0.087                                         | -0.064                        | 6453.53 |
| -4.59     | -0.0052  | 1.11      | 0.23           | 2.32         | 0.65           | NA        | -0.18                  | -0.021    | -0.047       | NA            | NA             | -0.020      | NA                  | -0.68                   | 0.083                                         | -0.063                        | 6453.70 |
| -4.56     | -0.0026  | 1.02      | 0.22           | 2.15         | 0.64           | NA        | -0.18                  | 0.003     | -0.041       | -0.00023      | NA             | NA          | NA                  | -0.60                   | 0.092                                         | -0.070                        | 6454.28 |
| -4.73     | -0.0005  | 1.21      | 0.23           | 2.33         | 0.66           | NA        | -0.18                  | -0.013    | -0.047       | -0.00017      | NA             | -0.015      | -0.00183            | -0.68                   | 0.082                                         | -0.064                        | 6454.82 |
| -4.58     | -0.0040  | 1.11      | 0.23           | 2.30         | 0.64           | NA        | -0.19                  | -0.005    | -0.046       | -0.00017      | 0.020          | -0.013      | NA                  | -0.67                   | 0.088                                         | -0.064                        | 6454.88 |
| -4.57     | -0.0031  | 1.03      | 0.22           | 2.19         | 0.64           | NA        | -0.18                  | 0.011     | -0.041       | -0.00023      | 0.028          | NA          | NA                  | -0.62                   | 0.092                                         | -0.070                        | 6455.01 |
| -4.54     | NA       | 0.95      | 0.25           | 2.04         | 0.62           | NA        | -0.18                  | 0.017     | -0.044       | -0.00031      | NA             | NA          | NA                  | -0.55                   | 0.095                                         | -0.072                        | 6455.05 |
| -4.60     | -0.0054  | 1.11      | 0.22           | 2.34         | 0.65           | NA        | -0.18                  | -0.015    | -0.046       | NA            | 0.016          | -0.019      | NA                  | -0.69                   | 0.083                                         | -0.063                        | 6455.30 |
| -4.71     | -0.0029  | 1.18      | 0.23           | 2.36         | 0.66           | NA        | -0.17                  | -0.022    | -0.047       | NA            | NA             | -0.020      | -0.00133            | -0.70                   | 0.079                                         | -0.063                        | 6455.31 |
| -4.57     | -0.0038  | 1.11      | 0.23           | 2.28         | 0.64           | 0.0030    | -0.19                  | -0.013    | -0.047       | -0.00016      | NA             | -0.015      | NA                  | -0.66                   | 0.088                                         | -0.064                        | 6455.44 |

**Table S3.** Parameter coefficients and AIC values for the top TON model, and models within to AIC of the top model.

| Intercept | % Forest | Atm N dep | Agricultural N | % Impervious | Point source N | Discharge | % Riparian disturbance | % Wetland | % Open water | Precipitation | Substrate Size | Temperature | Atm N * % Forest | Atm N * % Impervious | Agricultural N * % Riparian disturbance | Agricultural N * % Wetland | AIC     |
|-----------|----------|-----------|----------------|--------------|----------------|-----------|------------------------|-----------|--------------|---------------|----------------|-------------|------------------|----------------------|-----------------------------------------|----------------------------|---------|
| -1.12     | -0.015   | -0.040    | 0.20           | NA           | 0.082          | -0.011    | 0.18                   | 0.26      | 0.046        | -0.00062      | -0.12          | 0.016       | 0.0036           | NA                   | -0.034                                  | -0.054                     | 4411.33 |
| -1.14     | -0.015   | -0.030    | 0.20           | NA           | NA             | -0.009    | 0.19                   | 0.26      | 0.046        | -0.00061      | -0.12          | 0.015       | 0.0036           | NA                   | -0.035                                  | -0.053                     | 4411.49 |
| -1.15     | -0.015   | -0.005    | 0.19           | NA           | NA             | NA        | 0.18                   | 0.26      | 0.044        | -0.00062      | -0.13          | 0.015       | 0.0035           | NA                   | -0.033                                  | -0.053                     | 4411.62 |
| -1.16     | -0.014   | -0.011    | 0.20           | -0.043       | 0.106          | -0.011    | 0.20                   | 0.26      | 0.046        | -0.00061      | -0.12          | 0.016       | 0.0033           | NA                   | -0.038                                  | -0.053                     | 4412.58 |
| -1.14     | -0.015   | -0.007    | 0.19           | NA           | 0.054          | NA        | 0.17                   | 0.26      | 0.043        | -0.00062      | -0.13          | 0.015       | 0.0035           | NA                   | -0.032                                  | -0.053                     | 4412.61 |

**Table S4.** Results of the final multiple regression TN models based on forward and backward stepwise regression, with selection based on the lowest AIC values. The models use either land cover variables (%wetland, %forest, %impervious) and N input variables corresponding to the whole watershed or 100 m riparian buffer. Coefficients are unstandardized. Partial  $r^2$  value for each variable was calculated as the average  $r^2$  contribution over all orderings of regressors, based on the method from Lindeman, Merenda, and Gold (1980) (R package relaimpo, “lmg” approach).

|                                         | Watershed predictor variables                   |         |        |               | Riparian buffer predictor variables             |         |        |               |
|-----------------------------------------|-------------------------------------------------|---------|--------|---------------|-------------------------------------------------|---------|--------|---------------|
|                                         | coefficient                                     | SE      | p      | partial $r^2$ | coefficient                                     | SE      | p      | partial $r^2$ |
| Intercept                               | -1.440                                          | 0.142   | <0.001 | NA            | -1.330                                          | 0.122   | <0.001 | NA            |
| Agricultural N                          | 0.244                                           | 0.027   | <0.001 | 0.160         | 0.128                                           | 0.014   | <0.001 | 0.159         |
| Wetland                                 | 0.216                                           | 0.028   | <0.001 | 0.006         | 0.124                                           | 0.024   | <0.001 | 0.005         |
| Riparian disturbance                    | 0.026                                           | 0.037   | 0.478  | 0.115         | 0.013                                           | 0.044   | 0.705  | 0.124         |
| Atm N deposition                        | 0.422                                           | 0.094   | <0.001 | 0.072         | 0.345                                           | 0.083   | <0.001 | 0.069         |
| % Forest                                | -0.013                                          | 0.002   | <0.001 | 0.120         | -0.014                                          | 0.003   | <0.001 | 0.121         |
| % Impervious                            | 0.953                                           | 0.239   | <0.001 | 0.038         | 0.209                                           | 0.056   | 0.318  | 0.017         |
| Point source N                          | 0.420                                           | 0.061   | <0.001 | 0.020         | 0.476                                           | 0.061   | <0.001 | 0.024         |
| Precipitation                           | -0.00047                                        | 0.00006 | <0.001 | 0.028         | -0.00048                                        | 0.00007 | <0.001 | 0.025         |
| Temperature                             |                                                 |         |        |               | 0.015                                           | 0.005   | 0.005  | 0.008         |
| Discharge                               | -0.018                                          | 0.006   | 0.003  | 0.002         | -0.017                                          | 0.006   | 0.008  | 0.002         |
| % Open water                            |                                                 |         |        |               | 0.016                                           | 0.010   | 0.101  | 0.002         |
| Substrate size                          | -0.059                                          | 0.015   | <0.001 | 0.027         | -0.059                                          | 0.015   | <0.001 | 0.027         |
| Agricultural N X % wetland              | -0.089                                          | 0.011   | <0.001 | 0.015         | -0.031                                          | 0.005   | <0.001 | 0.010         |
| Agricultural N X % riparian disturbance | 0.023                                           | 0.010   | 0.020  | 0.001         | 0.013                                           | 0.006   | 0.016  | 0.001         |
| Atm N dep X % forest                    | 0.002                                           | 0.001   | 0.090  | 0.001         | 0.002                                           | 0.001   | 0.097  | 0.001         |
| Atm N dep X % impervious                | -0.285                                          | 0.093   | 0.002  | 0.003         |                                                 |         |        |               |
| Model                                   | $r^2 = 0.607$ , adj $r^2 = 0.604$ , $p < 0.001$ |         |        |               | $r^2 = 0.597$ , adj $r^2 = 0.593$ , $p < 0.001$ |         |        |               |

**Table S5.** Results of the final multiple regression DIN models based on forward and backward stepwise regression, with selection based on the lowest AIC values. The models use either land cover variables (%wetland, %forest, %impervious) and N input variables corresponding to the whole watershed or 100 m riparian buffer. Coefficients are unstandardized. Partial  $r^2$  value for each variable was calculated as the average  $r^2$  contribution over all orderings of regressors, based on the method from Lindeman, Merenda, and Gold (1980) (R package relaimpo, “lmg” approach).

|                                         | Watershed predictor variables                   |         |        |       | Riparian buffer predictor variables             |         |        |       |
|-----------------------------------------|-------------------------------------------------|---------|--------|-------|-------------------------------------------------|---------|--------|-------|
|                                         | coefficient                                     | SE      | p      | lmg   | coefficient                                     | SE      | p      | lmg   |
| Intercept                               | -4.569                                          | 0.155   | <0.001 | NA    | -4.739                                          | 0.240   | <0.001 | NA    |
| Agricultural N                          | 0.227                                           | 0.046   | <0.001 | 0.136 | 0.121                                           | 0.023   | 0.000  | 0.120 |
| Wetland                                 | -0.012                                          | 0.052   | 0.813  | 0.005 | 0.008                                           | 0.040   | 0.838  | 0.003 |
| Riparian disturbance                    | -0.192                                          | 0.063   | 0.002  | 0.088 | -0.226                                          | 0.075   | 0.003  | 0.084 |
| Atm N deposition                        | 1.108                                           | 0.119   | <0.001 | 0.102 | 1.235                                           | 0.153   | <0.001 | 0.128 |
| % Forest                                | -0.004                                          | 0.002   | 0.028  | 0.016 | 0.000                                           | 0.004   | 0.953  | 0.020 |
| % Impervious                            | 2.289                                           | 0.413   | <0.001 | 0.063 | 1.452                                           | 0.355   | <0.001 | 0.048 |
| Point source N                          | 0.643                                           | 0.100   | <0.001 | 0.030 | 0.749                                           | 0.101   | <0.001 | 0.032 |
| Precipitation                           | -0.00016                                        | 0.00110 | 0.142  | 0.005 | -0.00020                                        | 0.00010 | 0.052  | 0.005 |
| Temperature                             | -0.015                                          | 0.009   | 0.099  | 0.009 |                                                 |         |        |       |
| Discharge                               |                                                 |         |        |       |                                                 |         |        |       |
| % Open water                            | 0.047                                           | 0.016   | 0.005  | 0.002 | -0.050                                          | 0.016   | 0.002  | 0.002 |
| Substrate size                          |                                                 |         |        |       |                                                 |         |        |       |
| Agricultural N X % wetland              | -0.064                                          | 0.019   | 0.001  | 0.004 | -0.024                                          | 0.008   | 0.002  | 0.003 |
| Agricultural N X % riparian disturbance | 0.087                                           | 0.016   | <0.001 | 0.007 | 0.044                                           | 0.009   | <0.001 | 0.007 |
| Atm N dep X % forest                    |                                                 |         |        |       | -0.003                                          | 0.002   | 0.143  | 0.001 |
| Atm N dep X % impervious                | -0.659                                          | 0.159   | <0.001 | 0.004 | -0.333                                          | 0.142   | 0.019  | 0.001 |
| Model                                   | $r^2 = 0.470$ , adj $r^2 = 0.467$ , $p < 0.001$ |         |        |       | $r^2 = 0.456$ , adj $r^2 = 0.452$ , $p < 0.001$ |         |        |       |

**Table S6.** Results of the final multiple regression TON models based on forward and backward stepwise regression, with selection based on the lowest AIC values. The models use either land cover variables (%wetland, %forest, %impervious) and N input variables corresponding to the whole watershed or 100 m riparian buffer. Coefficients are unstandardized. Partial  $r^2$  value for each variable was calculated as the average  $r^2$  contribution over all orderings of regressors, based on the method from Lindeman, Merenda, and Gold (1980) (R package relaimpo, “lmg” approach).

|                                         | Watershed predictor variables                   |        |        |       | Riparian buffer predictor variables             |        |        |       |
|-----------------------------------------|-------------------------------------------------|--------|--------|-------|-------------------------------------------------|--------|--------|-------|
|                                         | coefficient                                     | SE     | p      | lmg   | coefficient                                     | SE     | p      | lmg   |
| Intercept                               | -1.122                                          | 0.117  | <0.001 | NA    | -1.036                                          | 0.141  | <0.001 | NA    |
| Agricultural N                          | 0.204                                           | 0.027  | <0.001 | 0.081 | 0.109                                           | 0.014  | <0.001 | 0.078 |
| Wetland                                 | 0.265                                           | 0.031  | <0.001 | 0.041 | 0.156                                           | 0.025  | <0.001 | 0.031 |
| Riparian disturbance                    | 0.183                                           | 0.032  | 0.000  | 0.065 | 0.178                                           | 0.044  | <0.001 | 0.063 |
| Atm N deposition                        | -0.040                                          | 0.080  | 0.616  | 0.017 | -0.070                                          | 0.095  | 0.459  | 0.019 |
| % Forest                                | -0.015                                          | 0.003  | <0.001 | 0.129 | -0.016                                          | 0.003  | <0.001 | 0.148 |
| % Impervious                            |                                                 |        |        |       | -0.467                                          | 0.209  | 0.026  | 0.003 |
| Point source N                          | 0.082                                           | 0.056  | 0.143  | 0.002 | 0.118                                           | 0.061  | 0.054  | 0.002 |
| Precipitation                           | -0.0006                                         | 0.0001 | <0.001 | 0.055 | -0.0006                                         | 0.0001 | <0.001 | 0.050 |
| Temperature                             | 0.016                                           | 0.005  | 0.004  | 0.005 | 0.017                                           | 0.005  | 0.002  | 0.005 |
| Discharge                               | -0.011                                          | 0.006  | 0.071  | 0.001 | -0.012                                          | 0.006  | 0.055  | 0.002 |
| % Open water                            | 0.046                                           | 0.010  | <0.001 | 0.014 | 0.060                                           | 0.010  | <0.001 | 0.016 |
| Substrate size                          | -0.123                                          | 0.015  | <0.001 | 0.061 | -0.123                                          | 0.015  | <0.001 | 0.059 |
| Agricultural N X % wetland              | -0.054                                          | 0.011  | <0.001 | 0.007 | -0.018                                          | 0.005  | <0.001 | 0.005 |
| Agricultural N X % riparian disturbance | -0.034                                          | 0.009  | <0.001 | 0.006 | -0.017                                          | 0.006  | 0.002  | 0.005 |
| Atm N dep X % forest                    | 0.004                                           | 0.001  | 0.003  | 0.005 | 0.004                                           | 0.001  | 0.005  | 0.004 |
| Atm N dep X % impervious                |                                                 |        |        |       | 0.165                                           | 0.084  | 0.050  | 0.001 |
| Model                                   | $r^2 = 0.489$ , adj $r^2 = 0.485$ , $p < 0.001$ |        |        |       | $r^2 = 0.491$ , adj $r^2 = 0.487$ , $p < 0.001$ |        |        |       |

S5. Correlations among predictor variables

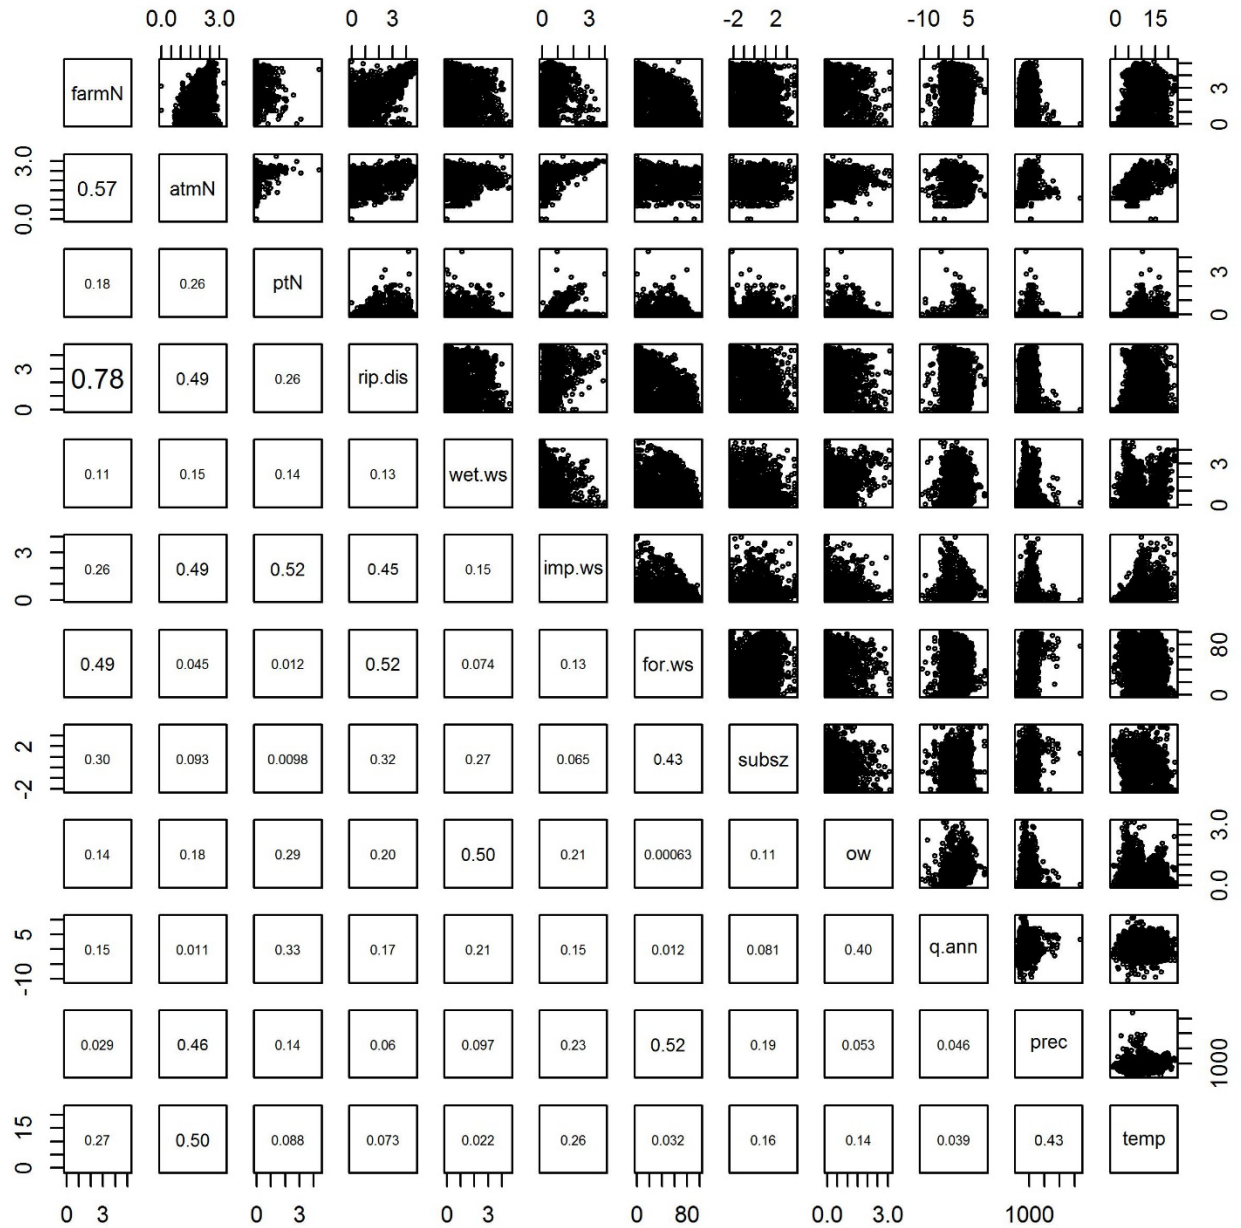

**Figure S5.** Correlations among N concentrations and predictor variables. The panels in the lower left contain  $r$  values corresponding to relationships shown in the upper right. Variables are, from top left to bottom right, agricultural N inputs, atmospheric N deposition, point source N, % riparian disturbance, % wetland, % impervious cover, % forest, substrate size, % open water, annual mean discharge, precipitation, and temperature.  $R$  values larger than 0.4 are shown with proportionally larger text. Values are transformed as indicated in Table 1 of the manuscript.



**Table S4.** P-values corresponding to linear correlations among variables shown in figure S5. Values less than 0.05 are shown in bold

|                                 | Agricultural<br>N | Atmospheric<br>N deposition | Point source<br>N | Riparian<br>disturbance | Wetland<br>cover | Impervious<br>cover | Forest cover     | Substrate<br>size | Open water       | Annual<br>mean | Mean annual<br>Precipitation | Mean annual |
|---------------------------------|-------------------|-----------------------------|-------------------|-------------------------|------------------|---------------------|------------------|-------------------|------------------|----------------|------------------------------|-------------|
| Agricultural<br>N               | NA                |                             |                   |                         |                  |                     |                  |                   |                  |                |                              |             |
| Atmospheric<br>N deposition     | <b>&lt;0.001</b>  | NA                          |                   |                         |                  |                     |                  |                   |                  |                |                              |             |
| Point Source<br>N               | <b>&lt;0.001</b>  | <b>&lt;0.001</b>            | NA                |                         |                  |                     |                  |                   |                  |                |                              |             |
| Riparian<br>disturbance         | <b>&lt;0.001</b>  | <b>&lt;0.001</b>            | <b>&lt;0.001</b>  | NA                      |                  |                     |                  |                   |                  |                |                              |             |
| Wetland<br>cover                | <b>&lt;0.001</b>  | <b>&lt;0.001</b>            | <b>&lt;0.001</b>  | <b>&lt;0.001</b>        | NA               |                     |                  |                   |                  |                |                              |             |
| Impervious<br>cover             | <b>&lt;0.001</b>  | <b>&lt;0.001</b>            | <b>&lt;0.001</b>  | <b>&lt;0.001</b>        | <b>&lt;0.001</b> | NA                  |                  |                   |                  |                |                              |             |
| Forest cover                    | <b>&lt;0.001</b>  | 0.047                       | 0.599             | <b>&lt;0.001</b>        | <b>0.001</b>     | <b>&lt;0.001</b>    | NA               |                   |                  |                |                              |             |
| Substrate<br>size               | <b>&lt;0.001</b>  | <b>&lt;0.001</b>            | 0.664             | <b>&lt;0.001</b>        | <b>&lt;0.001</b> | <b>0.004</b>        | <b>&lt;0.001</b> | NA                |                  |                |                              |             |
| Open water                      | <b>&lt;0.001</b>  | <b>&lt;0.001</b>            | <b>&lt;0.001</b>  | <b>&lt;0.001</b>        | <b>&lt;0.001</b> | <b>&lt;0.001</b>    | 0.978            | <b>&lt;0.001</b>  | NA               |                |                              |             |
| Annual<br>mean<br>discharge     | <b>&lt;0.001</b>  | 0.640                       | <b>&lt;0.001</b>  | <b>&lt;0.001</b>        | <b>&lt;0.001</b> | <b>&lt;0.001</b>    | 0.596            | <b>&lt;0.001</b>  | <b>&lt;0.001</b> | NA             |                              |             |
| Mean<br>annual<br>precipitation | 0.205             | <b>&lt;0.001</b>            | <b>&lt;0.001</b>  | <b>0.008</b>            | <b>&lt;0.001</b> | <b>&lt;0.001</b>    | <b>&lt;0.001</b> | <b>&lt;0.001</b>  | <b>0.019</b>     | 0.043          | NA                           |             |
| Mean<br>annual<br>temperature   | <b>&lt;0.001</b>  | <b>&lt;0.001</b>            | <b>&lt;0.001</b>  | <b>0.001</b>            | 0.322            | <b>&lt;0.001</b>    | 0.151            | <b>&lt;0.001</b>  | <b>&lt;0.001</b> | 0.087          | <b>&lt;0.001</b>             | NA          |
